# Supplementary material for: Excellent mechanical performance and enhanced dielectric properties of OBC/SiO2 elastomeric nanocomposites: effect of dispersion of the SiO2 nanoparticles
Source: Royal Society of Chemistry journal article supplement (doi:10.1039/c7ra08074c), 2017-01-01
Supplement: c7ra08074c1.pdf [file c7ra08074c1.pdf]

Excellent mechanical performances and enhanced dielectric properties of OBC/SiO<sub>2</sub>  
elastomeric nanocomposites: Effect of dispersion of SiO<sub>2</sub> nanoparticles

Xing Zhao, Lu Bai\*, Rui-Ying Bao, Zheng-Ying Liu, Ming-Bo Yang, Wei Yang\*

College of Polymer Science and Engineering, Sichuan University, State Key Laboratory of  
Polymer Materials Engineering, Chengdu, 610065, Sichuan, China

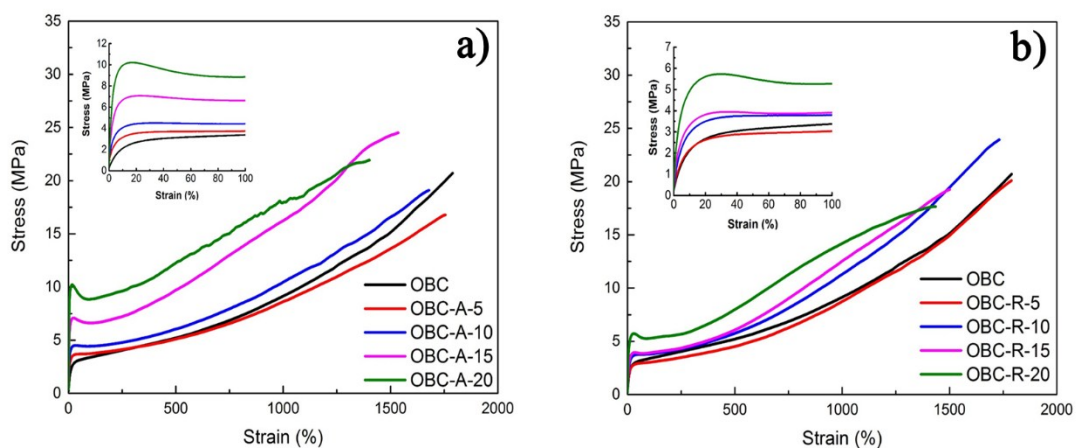

Fig. S1. The representative uniaxial tensile stress-strain curves of (a) OBC/A200 nanocomposites and (b) OBC/R974 nanocomposites.

\*Corresponding author. Tel.: + 86 28 8546 0130; fax: + 86 28 8546 0130.

E-mail addresses: [slulu\\_1116@163.com](mailto:slulu_1116@163.com) (L Bai) and [weiyang@scu.edu.cn](mailto:weiyang@scu.edu.cn) (W Yang)
